# Supplementary material for: MNK1 and MNK2 mediate adverse effects of high-fat feeding in distinct ways
Source: PubMed Central journal article supplement (PMC4834573; doi:10.1038/srep23476), 2016-04-18
Supplement: srep23476-s1.pdf [file srep23476-s1.pdf]

# Supplementary Information

## **MNK1 and MNK2 mediate adverse effects of high-fat feeding in distinct ways**

<sup>1,2</sup>Moore, C.E.J., <sup>1</sup>Pickford, J., <sup>3</sup>Cagampang, F.R., <sup>1</sup>Stead, R.L., <sup>1,2</sup>Tian, S., <sup>2</sup>Zhao, X., <sup>4</sup>Tang, X., <sup>5,6</sup>Byrne, C.D., <sup>1,2,7\*</sup>Proud, C.G.

<sup>1</sup> Centre for Biological Sciences, University of Southampton, Southampton, SO17 1BJ, United Kingdom

<sup>2</sup> Nutrition and Metabolism, South Australian Health & Medical Research Institute, North Terrace, Adelaide, SA5000, Australia

<sup>3</sup> Institute of Developmental Sciences, University of Southampton, Faculty of Medicine, Southampton SO16 6YD, United Kingdom

<sup>4</sup> Department of Biochemistry & Genetics, Zhejiang University School of Medicine, Hangzhou, Zhejiang 310058 China

<sup>5</sup> Nutrition and Metabolism, University of Southampton, Faculty of Medicine, Southampton SO16 6YD, United Kingdom

<sup>6</sup> Southampton National Institute for Health Research, Biomedical Research Centre, University Hospital, Southampton, UK

<sup>7</sup> School of Biological Sciences, University of Adelaide

\* present address, for correspondence: Nutrition & Metabolism, South Australian Health & Medical Research Institute, North Terrace, Adelaide, SA5000, Australia;

email: [christopher.proud@sahmri.com](mailto:christopher.proud@sahmri.com)

**Table S1**

Sequence of primers used in RT-qPCR

| <b>Gene</b>                     | <b>Forward</b>            | <b>Reverse</b>            |
|---------------------------------|---------------------------|---------------------------|
| <b>Mknk 1 (MNK1)</b>            | GATTCCTCTGAGACTCCAAGTTAA  | ACGCTTCTTCTTCCTCCTCTT     |
| <b>Mknk 2 (MNK2)</b>            | CCAGTGCCAGGGACATAGG       | GCCACGCATCTTCTCAAACA      |
| <b>ACC1</b>                     | GCAGTCTCCCAACTCCTACG      | CCACCATCACTCAGCCGAT       |
| <b>ATP citrate lyase (ACLY)</b> | CAGACCTATGACTATGCCAAGAC   | CAATGCTGCCTCCAATGATGA     |
| <b>GLUT4</b>                    | AAAAGTGCCCTGAAACCAGAG     | TCACCTCCTGCTCTAAAAGG      |
| <b>CPT1a</b>                    | AAACCTATTCGTCTTCTGGGATC   | ATGTGCCTGCTGTCTTGA        |
| <b>LXR<math>\alpha</math></b>   | ATCGCCTTGCTGAAGACCTCTG    | GATGGGGTTGATGAACTCCACC    |
| <b>CCR2</b>                     | ATTCTCCACACCCTGTTTCG      | GATTCCTGGAAGGTGGTCAA      |
| <b>CCR5</b>                     | CGAAAACACATGGTCAAACG      | GTTCTCCTGTGGATCGGGTA      |
| <b>SREBP1c</b>                  | GGAGCCATGGATTGCACATT      | CCTGTCTCACCCCCAGCATA      |
| <b>HSL</b>                      | CTC CAC ATG CCCCTC TAC AC | CAGAGCGCAAGCCACAAG        |
| <b>NRF2</b>                     | TCCGCCAGCTACTCCAGGTTGG    | TGGGCCCTGATGAGGGGCAGTG    |
| <b>C/EBP<math>\alpha</math></b> | GAACAGCAACGAGTACCGGGTA    | GCCATGGCCTTGACCAAGGAG     |
| <b>PPAR<math>\gamma</math></b>  | TCCGTGATGGAAGACCACTCGCAT  | CAGCAACCATTGGGTCAGCTCTTG  |
| <b>Heme oxygenase 1 (HO-1)</b>  | CCTCACTGGCAGGAAATCATC     | CCTCGTGGAGACGCTTTACATA    |
| <b>CD36</b>                     | TCATGCCAGTCGGAGACATGCTTA  | AACTGTCTGTACACAGTGGTGCCT  |
| <b>IL-6</b>                     | TCCATCCAGTTGCCTTCTTG      | GGTCTGTTGGGAGTGGTATC      |
| <b>IL-10</b>                    | GCTCTTACTGACTGGCATGAG     | CGCAGCTCTAGGAGCATGTG      |
| <b>CD11c</b>                    | CTGGATAGCCTTTCTTCTGCTG    | GCACACTGTGTCCGAACTC       |
| <b>TNF-<math>\alpha</math></b>  | TCTCAGCCTCTTCTCATTCTGCT   | AGAACTGATGAGAGGGAGGCCATT  |
| <b>MMP12</b>                    | TTGGATTATTGGAATGCTGC      | GCACATTTTATGAGGCAGA       |
| <b>CD68</b>                     | TTCTGCTGTGGAAATGCAAG      | AGAGGGGCTGGTAGGTTGAT      |
| <b>CD206</b>                    | CAGGTGTGGGCTCAGGTAGT      | TGTGGTGTGCTGAAAGGTGA      |
| <b>STAT6</b>                    | CTGGGGTGGTTTCCTCTTG       | TGCCCGGTCTCACCTAACTA      |
| <b>F4/80</b>                    | CTTTGGCTATGGGCTTCCAGTC    | GCAAGGAGGACAGAGTTTATCGTG  |
| <b>MHCII</b>                    | GACGCTCAACTTGCCCAAAC      | GCAGCCGTGAACTTGTGTAAC     |
| <b>ADAM8</b>                    | AGGATATTCAGCAGGTGTAGCAA   | TGCTAAAGGTATAGCAGGAGTCG   |
| <b>B2M</b>                      | CTGCTACGTAACACAGTTCCACCC  | CATGATGCTTGTATCACATGTCTCG |

Table S1. Sequence of primers used in RT-qPCR

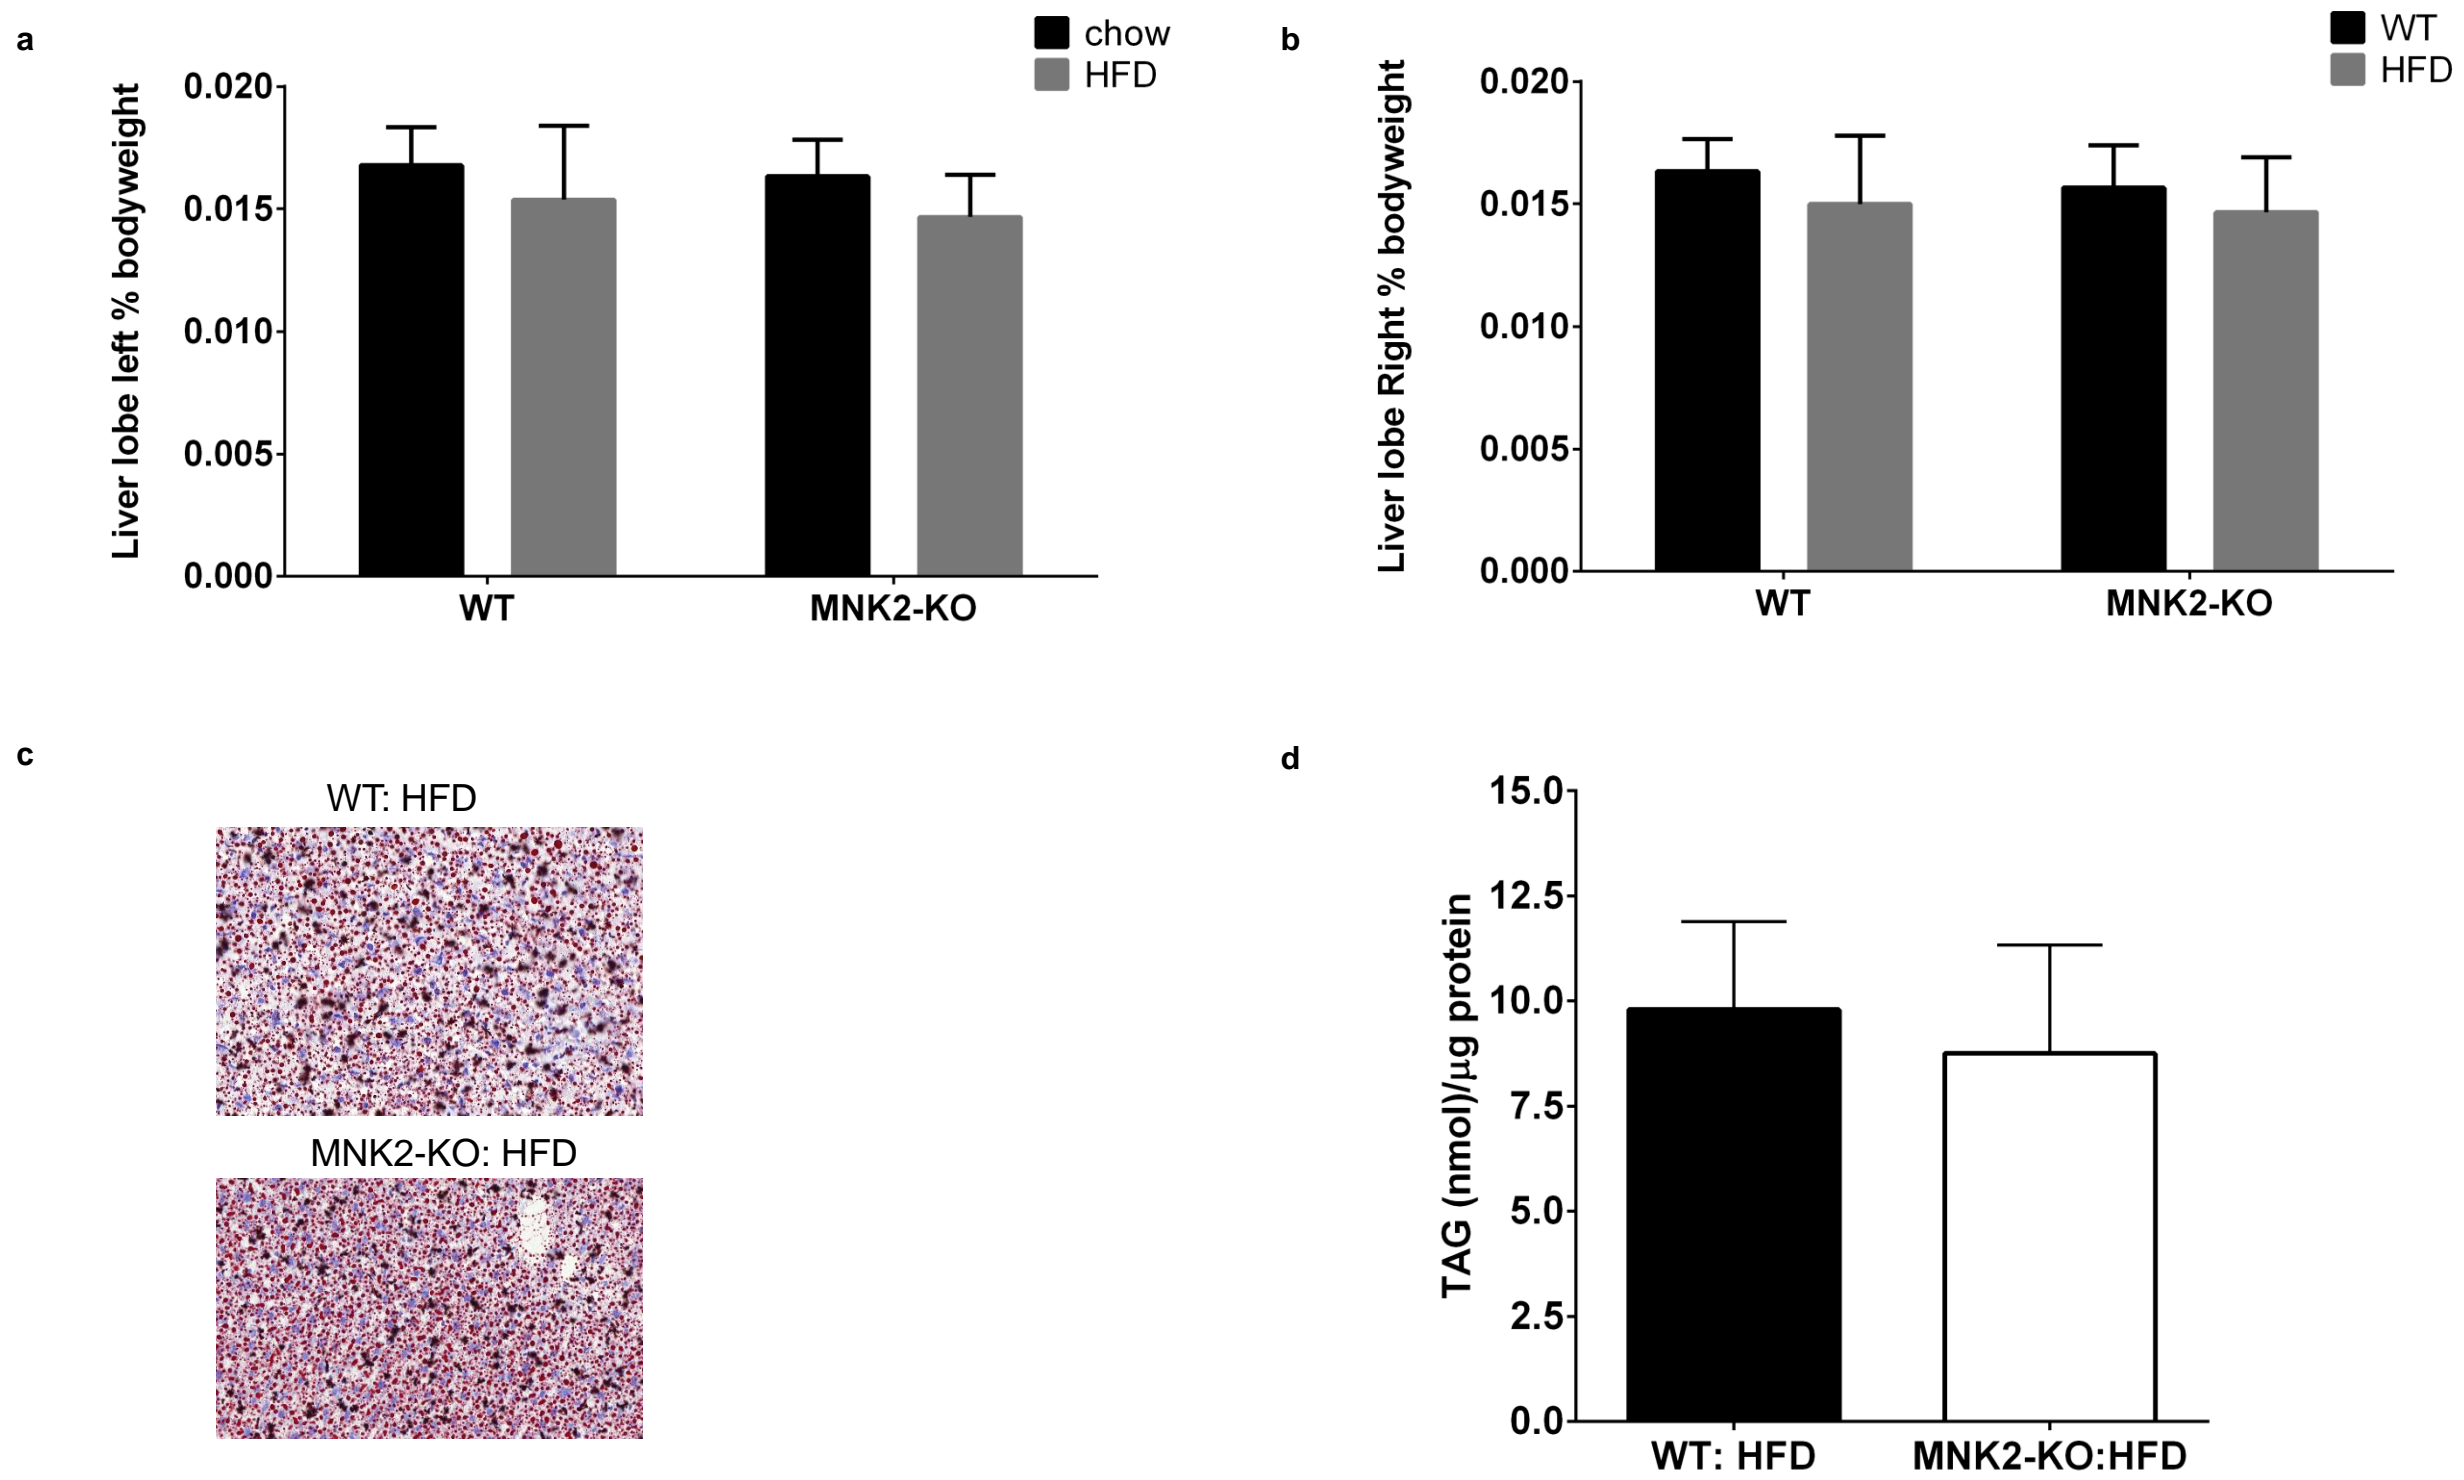

**Supplemental Figure 1**

Liver histology in WT and MNK2-KO mice (**A,B**) Liver weight of WT and MNK2-KO mice fed chow or the HFD. (n=8-9). Data are mean  $\pm$  SEM. (**C**) H&E and Oil Red O staining of livers from high fat-fed WT and MNK2-KO mice, 20x magnification. (**D**) Liver total TAG content (n=4-5). Data are mean  $\pm$  SEM.

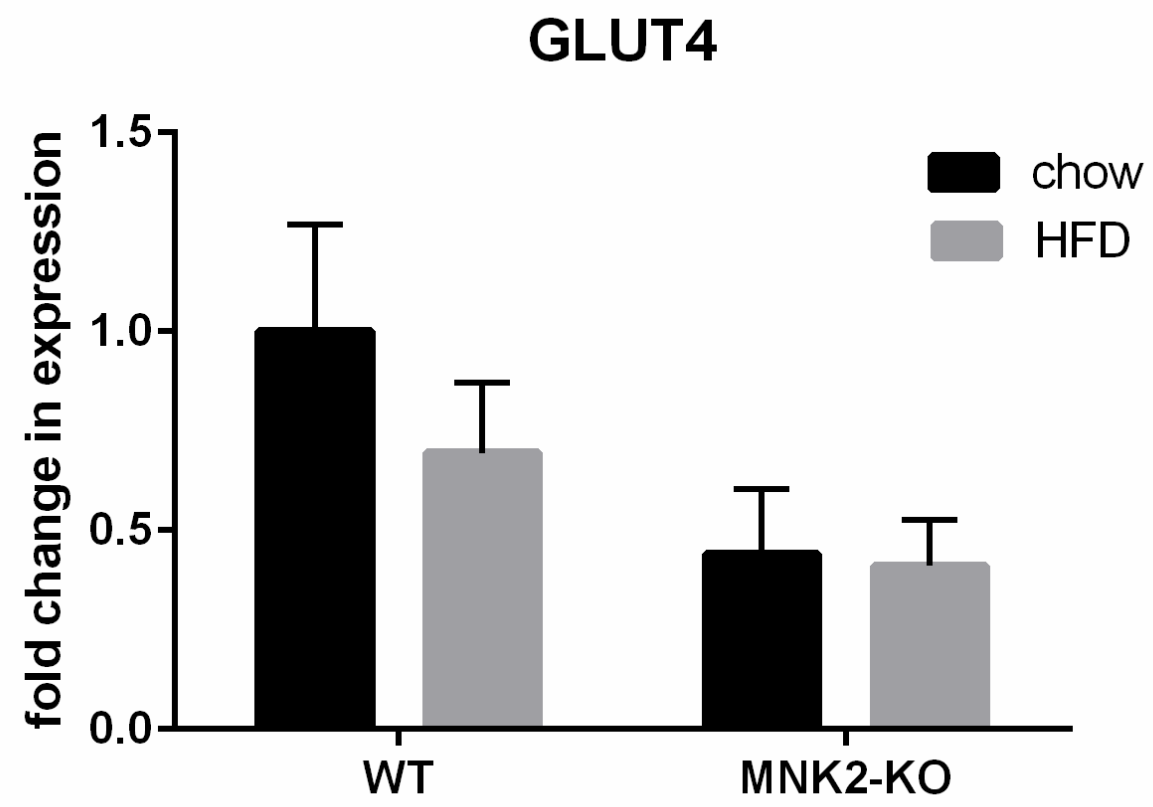

**Supplemental Figure 2**

Analysis of *GLUT4* mRNA levels in adipose tissue of WT and MNK-2-KO mice (A) Total RNA was isolated from gonadal adipose tissue from chow-fed and HFD-fed WT and MNK2-KO mice. The relative expression of mRNA for *GLUT4* was measured by qPCR (n=4). Data are mean  $\pm$  SEM relative to WT chow.

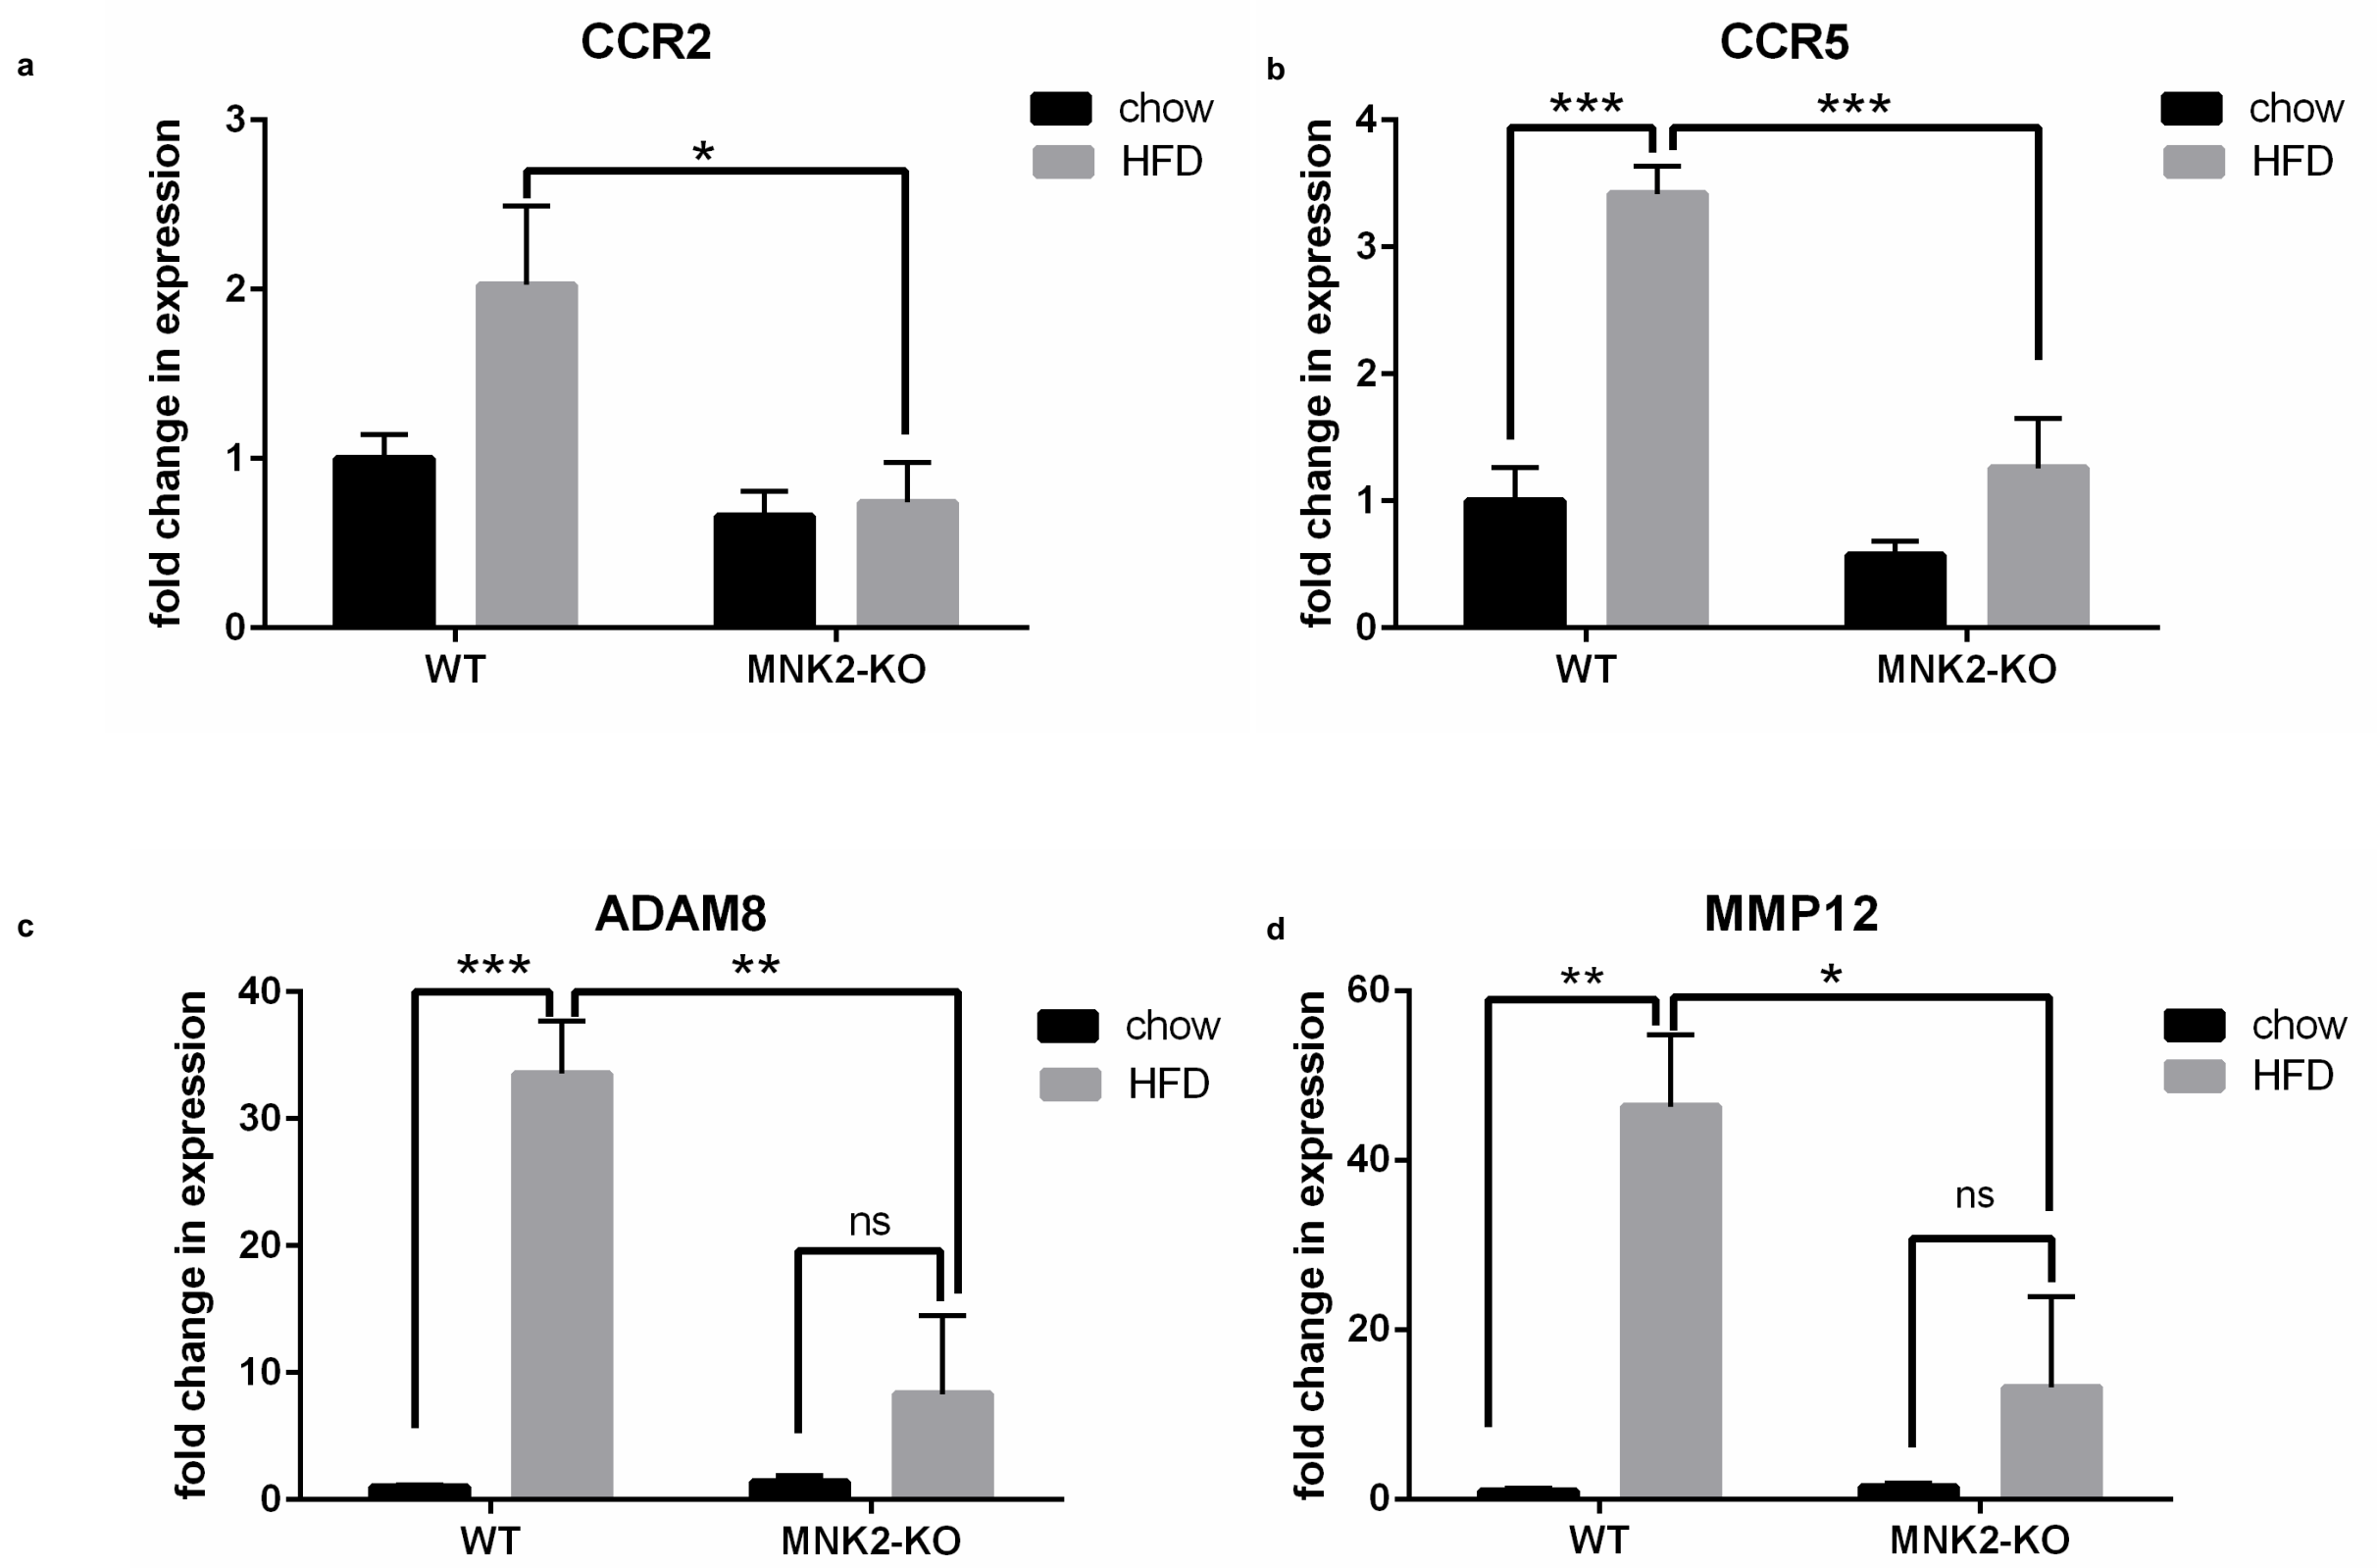

**Supplemental Figure 3**

Analysis of gene expression in fat tissue from WT and MNK2-KO mice. (A-D) Total RNA was isolated from gonadal adipose tissue from chow-fed and HFD-fed WT and MNK2-KO mice. The relative expression of mRNAs for macrophage markers (*CCR2* and *CCR5*) and tissue remodeling markers (*ADAM8* and *MMP12*) were measured by qPCR, (n=4). Data are mean  $\pm$  SEM relative to WT chow (two-way ANOVA followed by Tukey's post test) \* P <0.05, \*\* P <0.01, \*\*\* P <0.001.

a

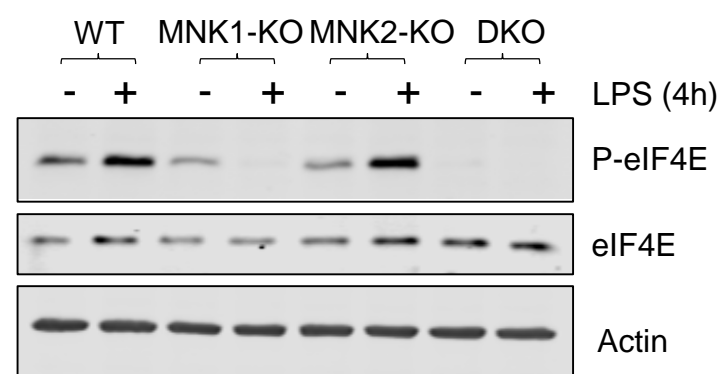

b

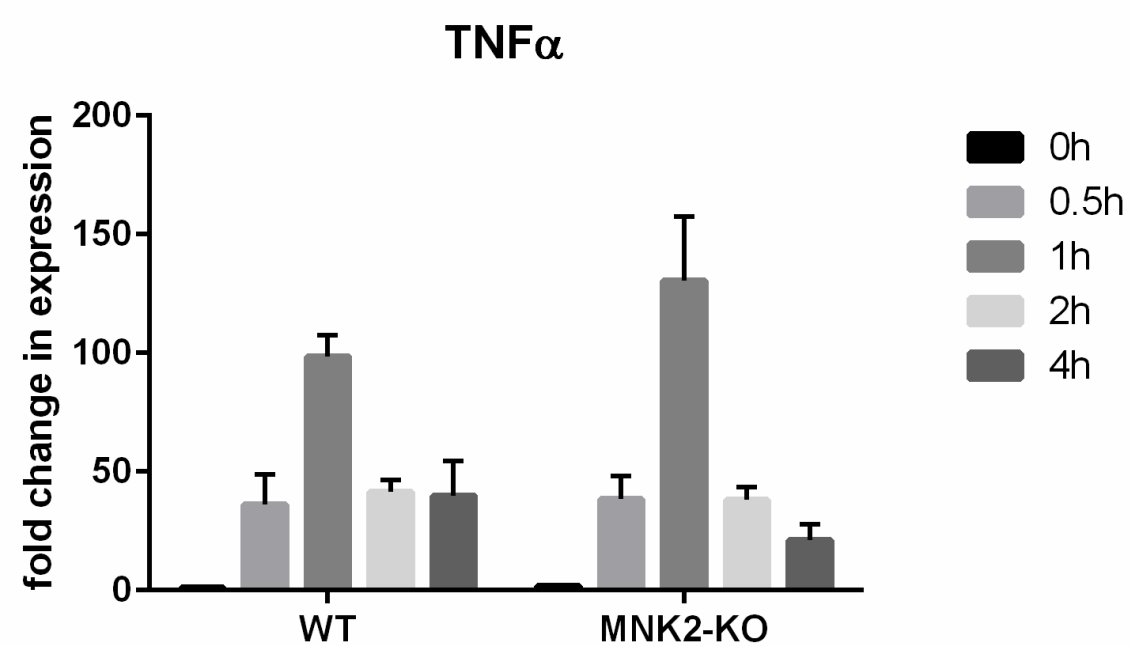

c

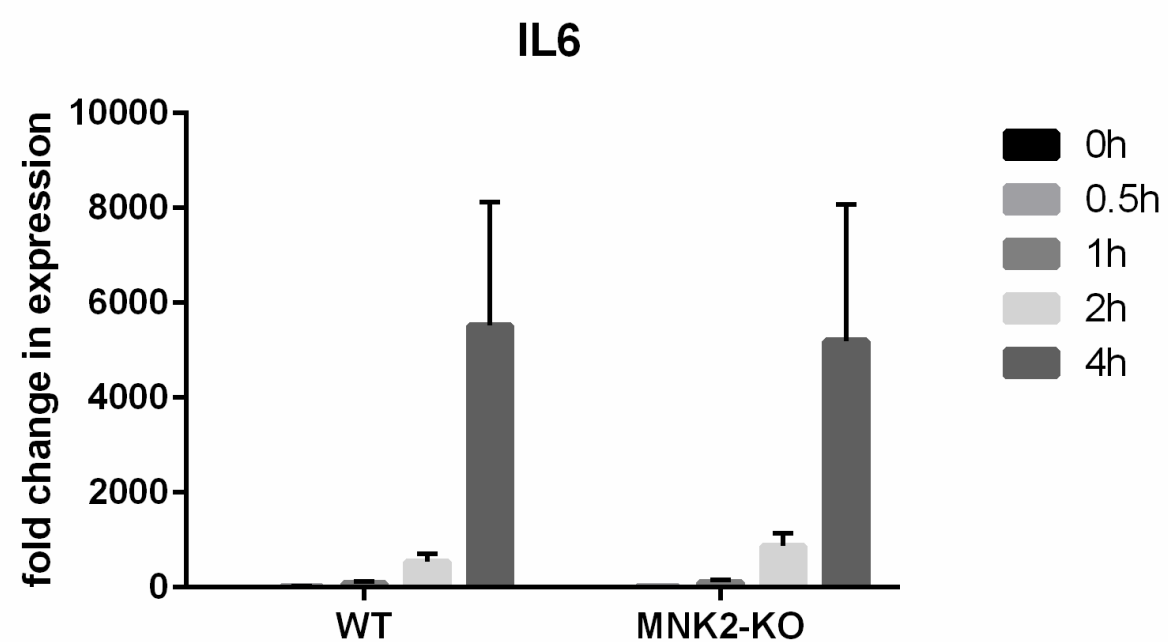

d

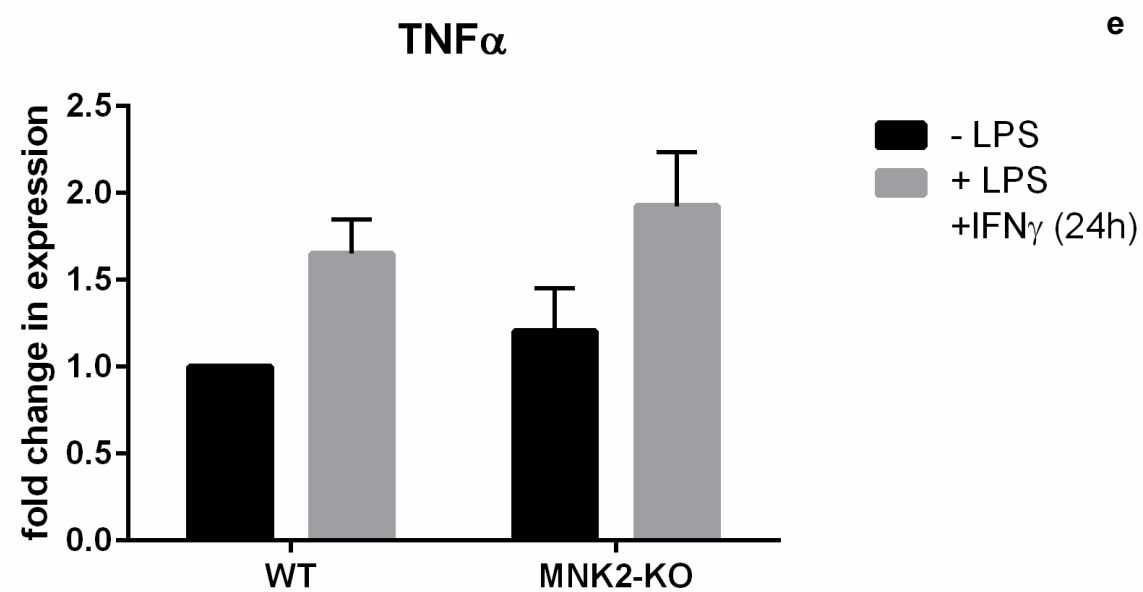

e

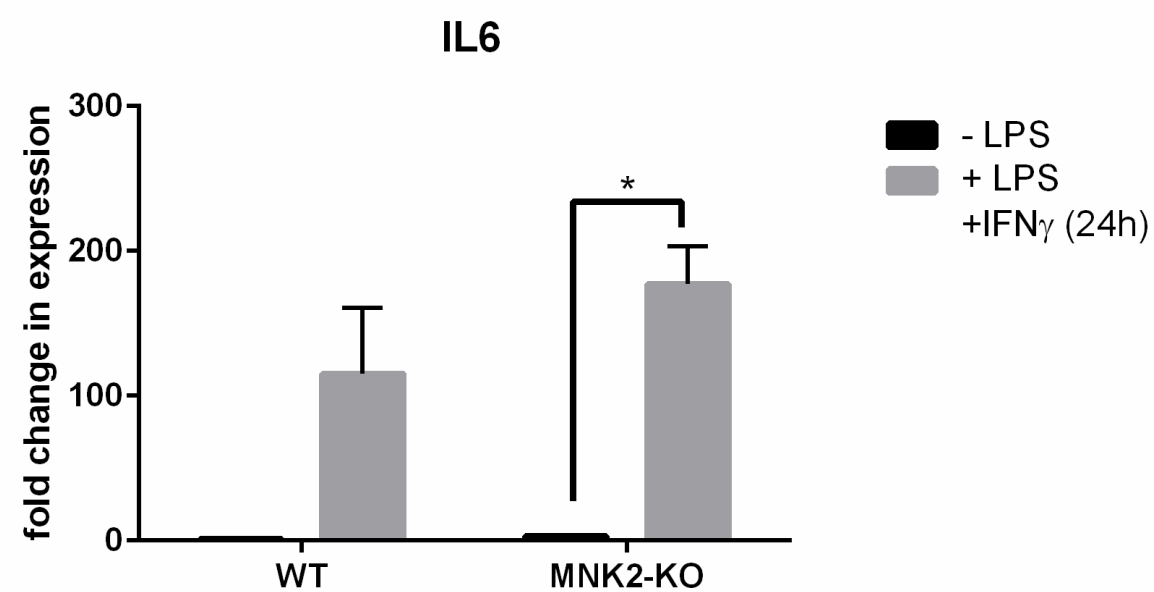

#### Supplemental Figure 4

Analysis of gene expression in stimulated BMDMs from WT and MNK2-KO mice. (A) BMDMs isolated from WT, MNK1-KO, MNK2-KO and MNK1/2-DKO mice were cultured for 4 h in the presence or absence of LPS (250 ng/ml). Lysates were analysed by immunoblot using the indicated antibodies, representative of 3 independent experiments. (B,C) BMDMs isolated from WT and MNK2-KO mice were treated with LPS (250 ng/ml) for the times indicated. Total RNA was isolated and the relative expression of mRNAs for *TNF $\alpha$*  and *IL6* was measured by qPCR (n=3). Data are mean  $\pm$  SEM relative to WT - LPS. (D,E) BMDMs isolated from WT or MNK2-KO mice were cultured for 24 h in the presence or absence of LPS (100 ng/ml) and IFN $\gamma$  (20 ng/ml) to polarize the BMDMs towards an M1 phenotype. The mRNA expression levels of the following M1 markers *TNF $\alpha$*  and *IL-6* were measured by qPCR (n=3). Data are mean  $\pm$  SEM relative to WT - LPS (2-tailed, unpaired Student's *t* test) \* P < 0.05.

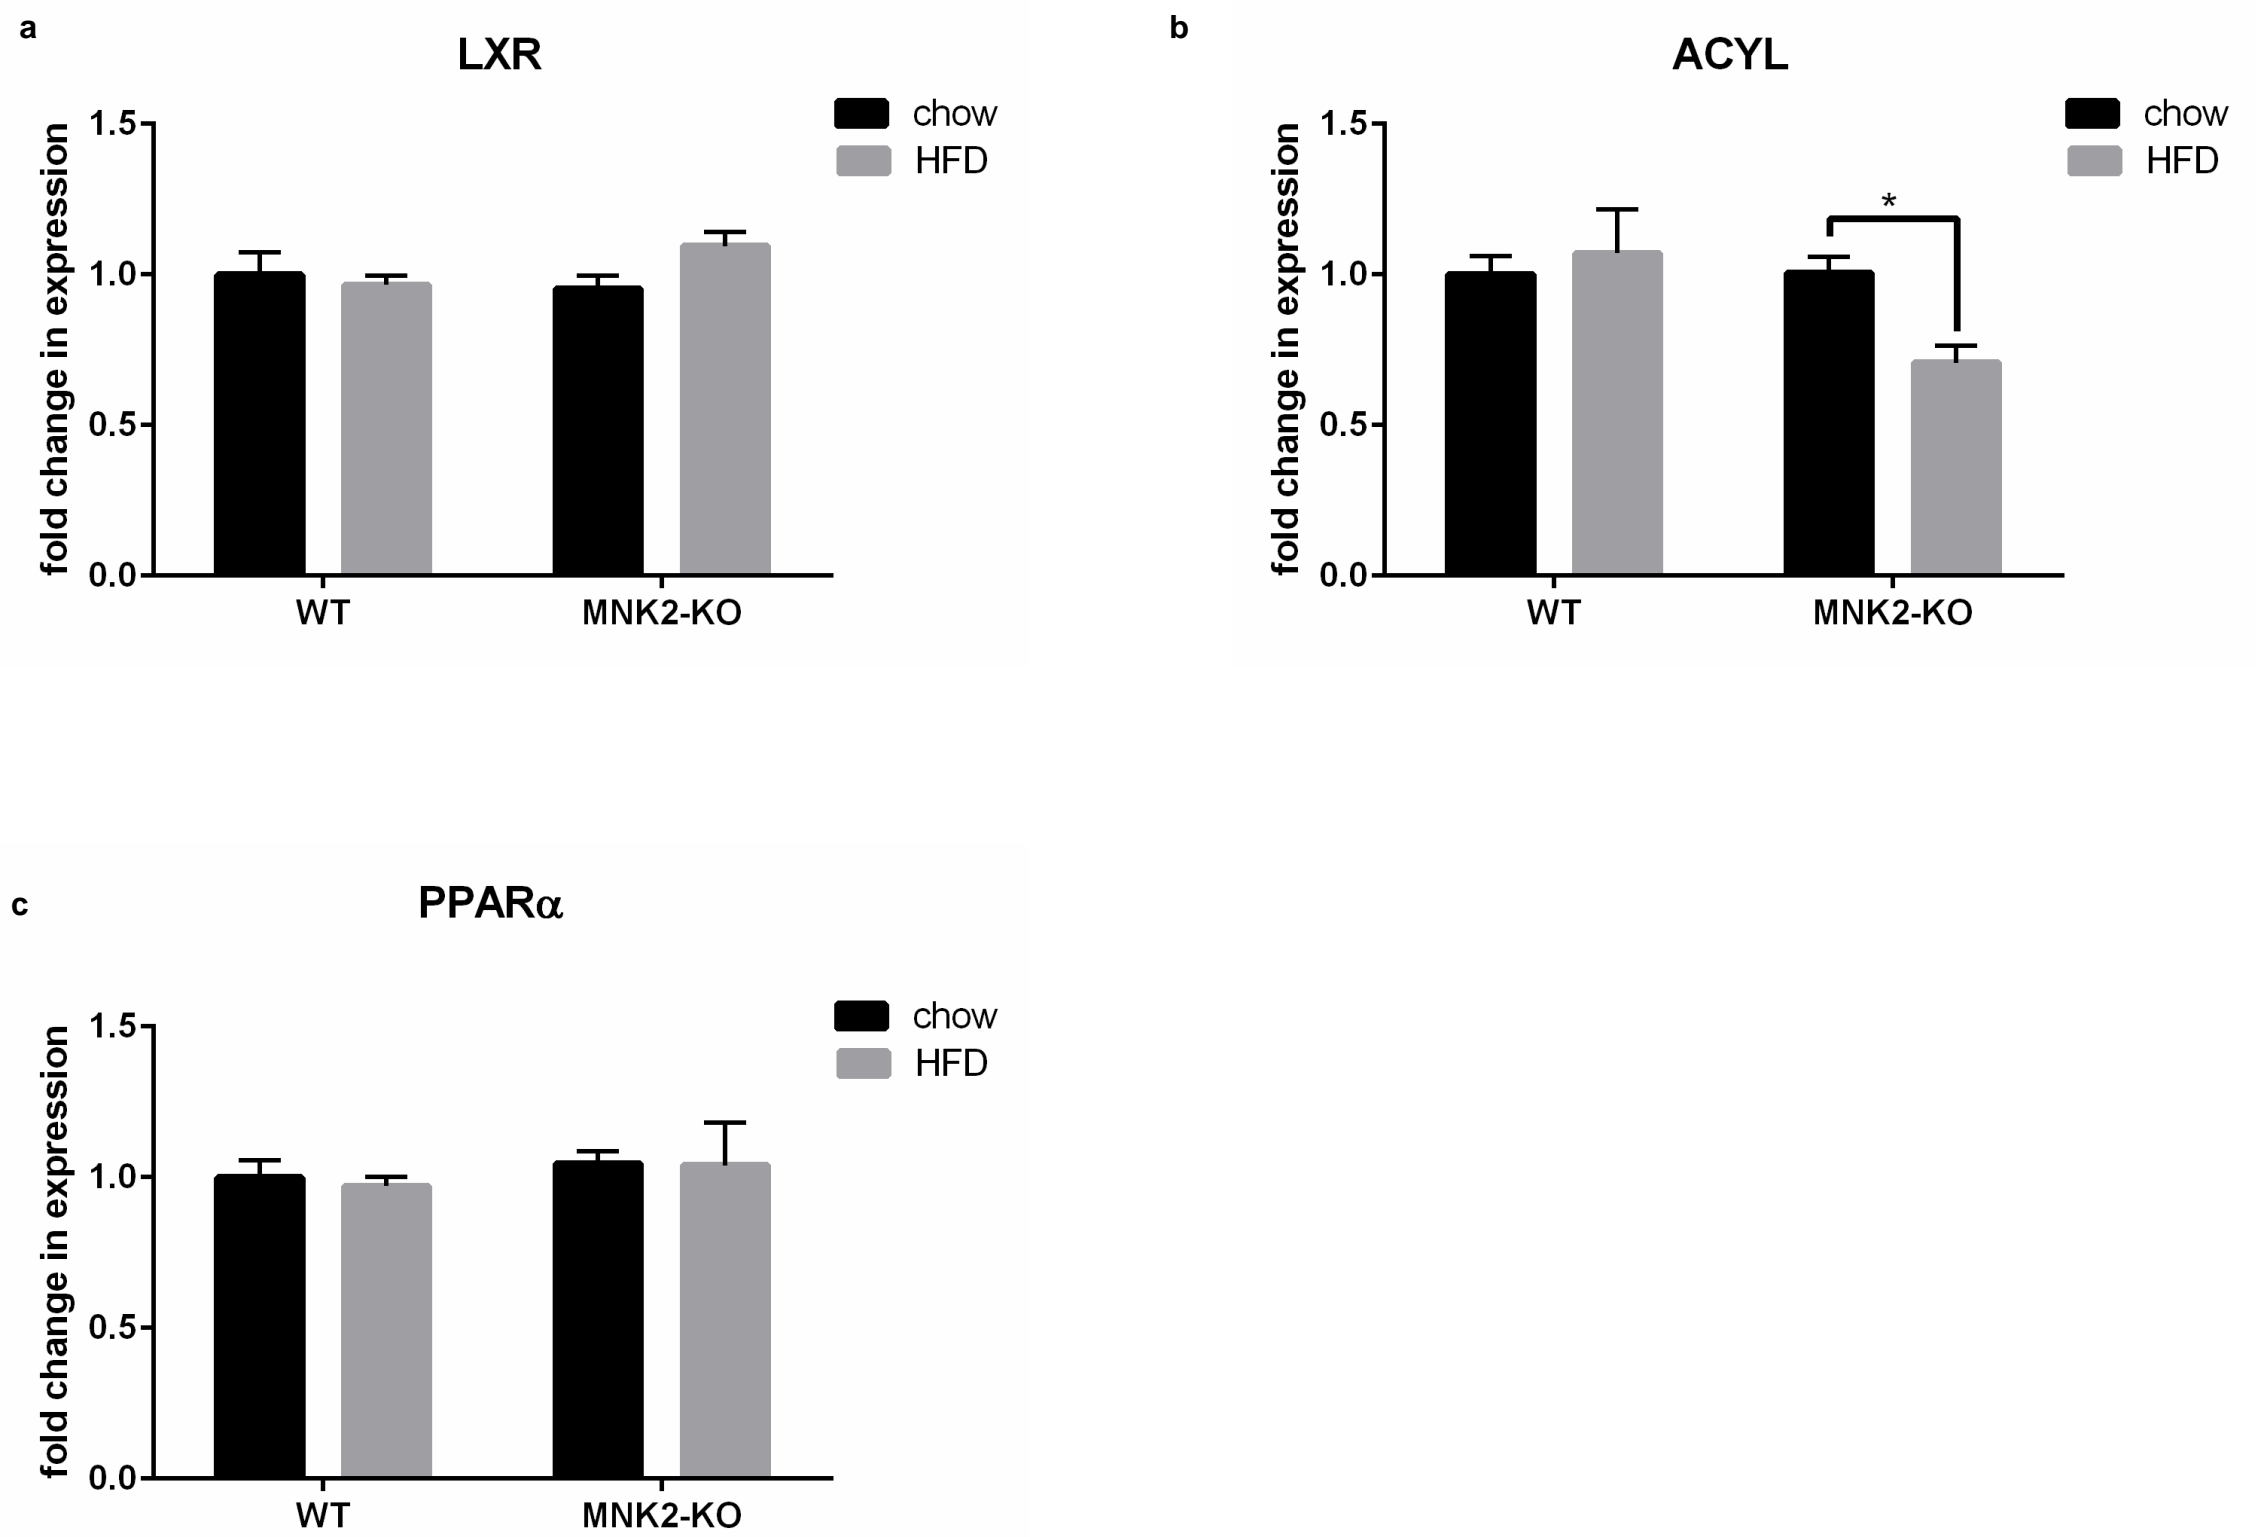

**Supplemental Figure 5**

Analysis of gene expression in liver from WT and MNK2-KO mice. **(A-C)** Total RNA was isolated from liver tissue from chow fed and HFD fed WT and MNK2-KO mice. The relative expression of *LXR*, *ACYL* and *PPAR $\alpha$*  was measured by qPCR (n=4). Data are mean  $\pm$  SEM relative to WT chow (2-tailed, unpaired Student's *t* test) \* P <0.05.

## Adipose Tissue HSL

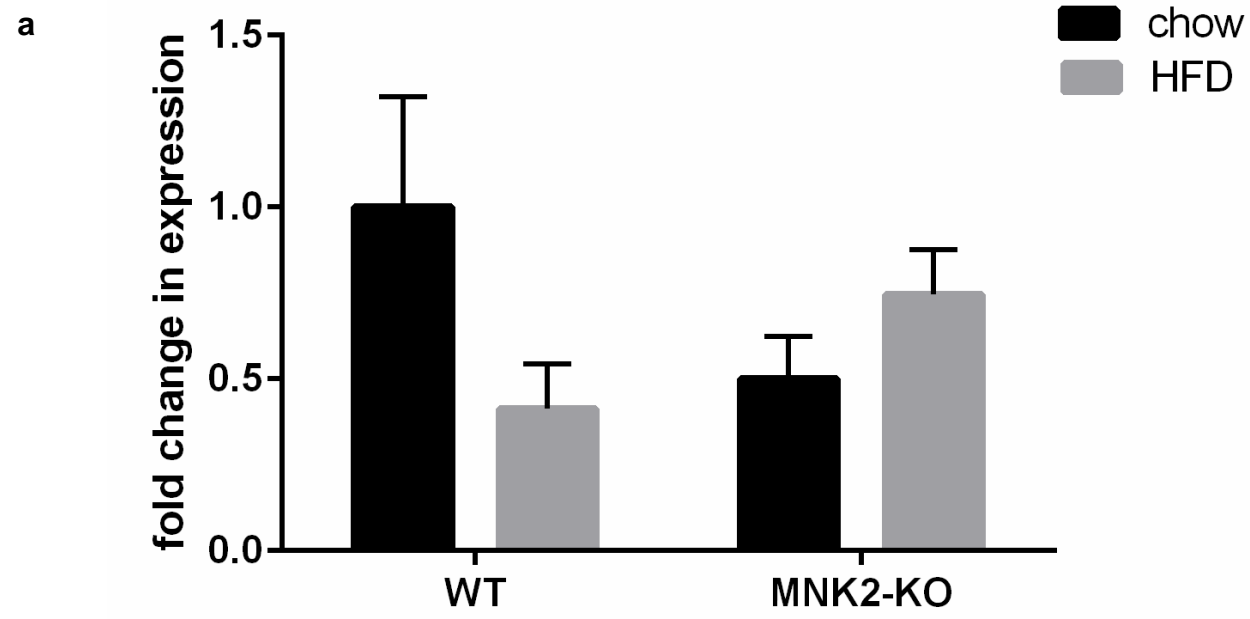

b

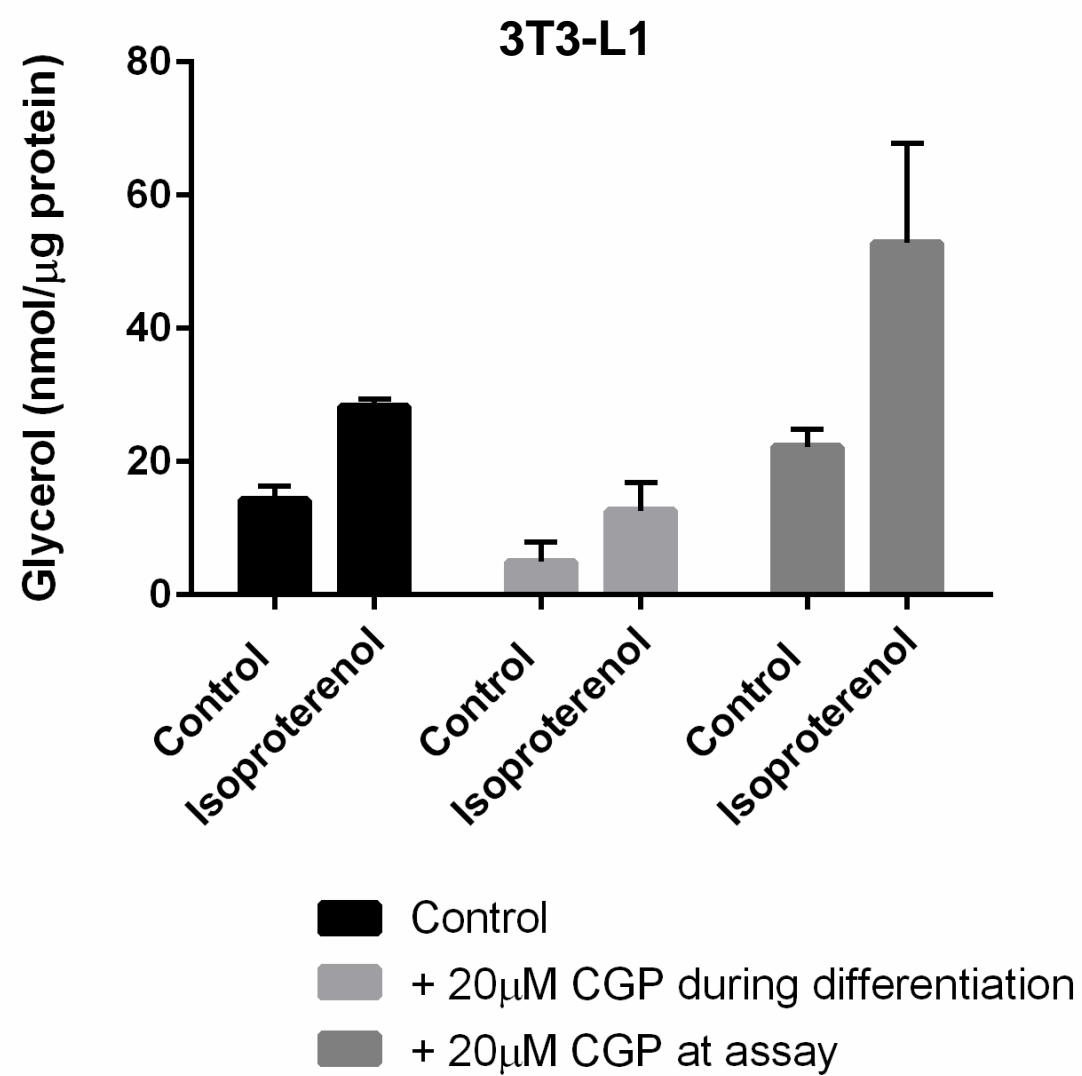

### Supplemental Figure 6

Effects of the MNKs on lipolysis. (A) Total RNA was isolated from gonadal adipose tissue from chow-fed and HFD-fed WT and MNK2-KO mice. The relative expression of *HSL* was measured by means of qPCR (n=4). Data are mean  $\pm$  SEM relative to WT chow (B) Lipolysis assay: 3T3-L1 cells were differentiated for 9 days in the presence or absence of 20  $\mu$ M CGP57380. Cells were treated with 100 nM isoproterenol for 3 h to induce glycerol production, in some cases 20  $\mu$ M CGP57380 was added at the start of the isoproterenol treatment.
